# Supplementary material for: Direct growth of graphene nanopatches on graphene sheets for highly conductive thin film applications
Source: Royal Society of Chemistry journal article supplement (doi:10.1039/c4tc02283a), 2014-11-26
Supplement: c4tc02283a1.pdf [file c4tc02283a1.pdf]

## Supporting Information

### Direct Growth of Graphene Nanopatches on Graphene Sheets for Highly Conductive Thin Film Applications

Wooseok Song,<sup>a,c</sup> Ki Woong Kim,<sup>a,c</sup> Sung-Jin Chang,<sup>b</sup> Tae Jung Park,<sup>b</sup> Sung Ho Kim,<sup>a</sup> Min Wook Jung,<sup>a</sup> Geonhee Lee,<sup>a</sup> Sung Myung,<sup>a,\*</sup> Jongsun Lim,<sup>a</sup> Sun Suk Lee,<sup>a</sup> and Ki-Seok An<sup>a</sup>

<sup>a</sup> Thin Film Materials Research Group, Korea Research Institute of Chemical Technology (KRICT), Yuseong Post Office Box 107, Daejeon 305-600, Republic of Korea

<sup>b</sup> Department of Chemistry, Chung-Ang University, 84 Heukseok-ro, Dongjak-gu, Seoul, 156-756, Republic of Korea

#### *Synthesis and transfer of GN-assembled graphene films.*

A conventional CVD system was used for the growth of graphene films. Initially, 25- $\mu$ m-thick Cu foil (Alfa Aesar, 99.8% purity) was prepared as a catalytic substrate for graphene growth. Cu foil was placed in the CVD reactor and heated to 1000 °C under a pressure of 5 Torr while H<sub>2</sub> (10 sccm) and Ar (1000 sccm) were introduced. Graphene was synthesized at 1000 °C by introducing CH<sub>4</sub> (30 sccm) with H<sub>2</sub> and Ar for 20 min. After turning off the flow of CH<sub>4</sub>, the CVD reactor was cooled to room temperature with H<sub>2</sub>/Ar. The graphene/Cu foil was immersed in NiCl<sub>2</sub> solution (0.2 M in ethanol) for 30 min. After assembly of the Ni NPs, the GNs were synthesized on the Ni-treated graphene under the same CVD conditions as graphene synthesis. The GN-assembled graphene film was then transferred to the desired substrates (300-nm-thick SiO<sub>2</sub>/Si (001) or glass) by a PMMA-assisted wet-transfer method.<sup>S1</sup> The PMMA dissolved in chlorobenzene was spin-coated onto the sample at 2000 rpm for 30 sec. The PMMA-coated sample was placed in Cu etchant (CE-100, Transene Company, Inc.) to remove the Cu foil. After the Cu foil was

completely etched away, the PMMA-coated sample was scooped out of the etchant using the desired substrates. The PMMA layer was then removed with acetone, and the surface was rinsed several times with DI water.

*Preparation and measurement of electronic devices based on graphene with GNs.*

For graphene device fabrication, an Al mask was initially patterned onto the graphene layer on a SiO<sub>2</sub> substrate, and subsequent oxygen plasma etching was conducted. After removing the Al mask patterns using Al etchant, the graphene channels were formed. Finally, electrochemically gated graphene-based FETs were fabricated by employing 1-butyl-3-methylimidazolium (BmimPF<sub>6</sub>) as an ionic liquid and Cr/Au (10nm /70nm) through a shadow mask as source/drain electrodes. Here, the length and width of the graphene-based devices were 100 and 200 μm, respectively. A Keithley-4200 semiconductor parameter analyzer was used for measurement and data collection.

[Ref S1] X. Li, Y. Zhu, W. Cai, M. Borysiak, B. Han, D. Chen, R. D. Piner, L. Colombo and R. S. Ruoff, *Nano Lett.*, 2009, **9**, 4359.
